# Supplementary material
Source: MDPI journal article supplement (https://www.mdpi.com/2035-8148/11/2/10)
Supplement: s1 [file s1]

## Supplementary Figure

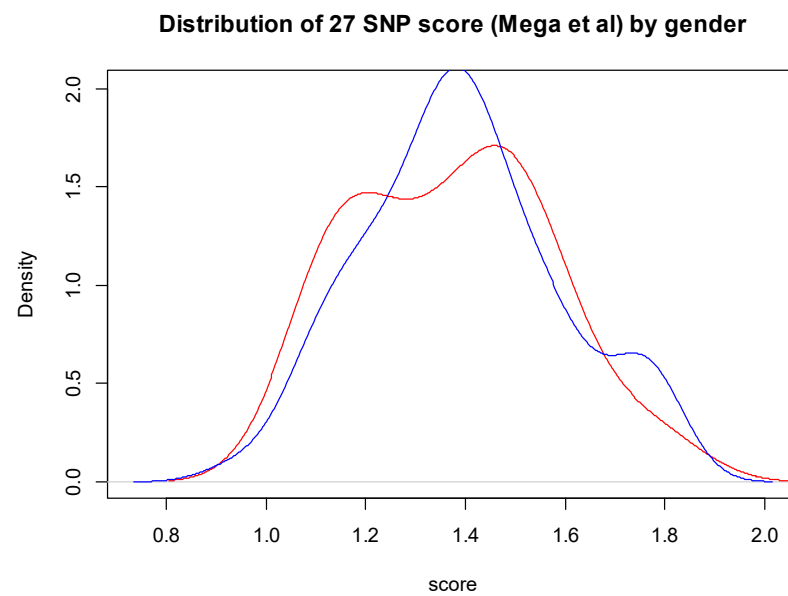

**Figure S1.** Distribution of 27 SNP genetic risk score by gender. Red = 15 women, Blue = 82 men.
